# Supplementary material for: Comprehensive phylogenomic analyses re-write the evolution of parasitism within cynipoid wasps
Source: PubMed Central journal article supplement (PMC7686688; doi:10.1186/s12862-020-01716-2), 2020-11-23
Supplement: 12862_2020_1716_MOESM10_ESM.pdf [file 12862_2020_1716_MOESM10_ESM.pdf]

**Additional files for Blaimer et al: Comprehensive phylogenomic analyses re-write the evolution of parasitism within cynipoid wasps. BMC Evolutionary Biology.**

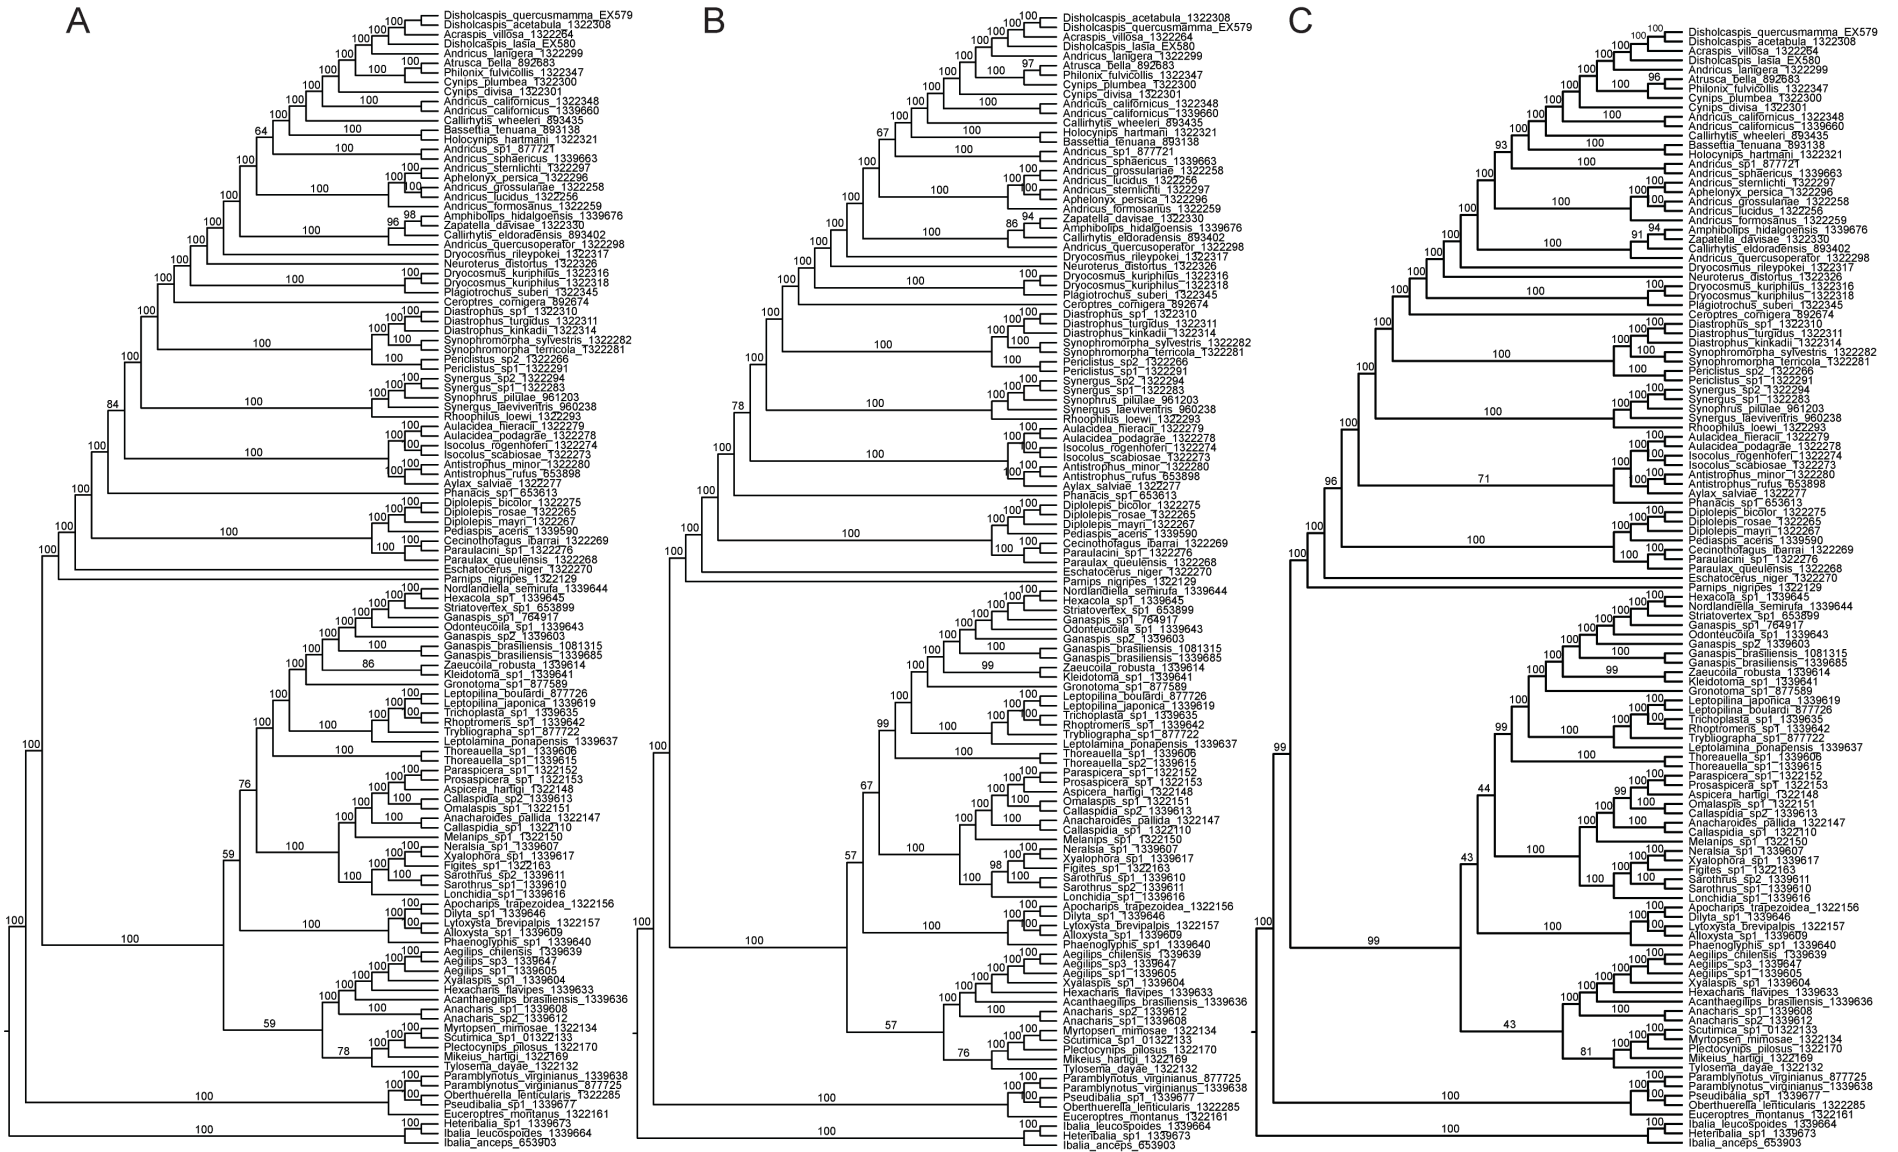

**Additional file 10: Additional trees estimated from ingroup-only analyses.** All trees are presented as cladograms for clarity of relationships, and are based on a combined ML search for the best tree and 1000 bootstrap replicates using unpartitioned data matrices. Bootstrap support values are displayed next to respective nodes. Analyses were rooted with *Ibala anceps* and excluded non-cynipoid outgroups. **A)** 50% completeness matrix, **B)** 60% completeness matrix, **C)** 70% completeness matrix.
